# Supplementary material for: A metal-free reduced graphene oxide coupled covalent imine network as an anode material for lithium-ion batteries
Source: Royal Society of Chemistry journal article supplement (doi:10.1039/d2ya00148a), 2022-01-01
Supplement: d2ya00148a1.pdf [file d2ya00148a1.pdf]

## Supporting Information

# A metal-free reduced graphene oxide coupled covalent imine network as anode material for lithium ion batteries

Sujan Mondal<sup>a</sup>, Santu Ruidas<sup>a</sup>, Kruti K. Halankar<sup>b</sup>, Balaji P Mandal<sup>b</sup>, Sasanka Dalapati<sup>c</sup>,  
Asim Bhaumik<sup>a\*</sup>

<sup>a</sup>School of Materials Sciences, Indian Association for the Cultivation of Science, Jadavpur, Kolkata 700032, India

<sup>b</sup>Chemistry Division, Bhabha Atomic Research Centre, Mumbai - 400085, India

<sup>c</sup>Department of Materials Science, School of Technology, Central University of Tamil Nadu (CUTN), Thiruvarur-610005, Tamil Nadu, India

| Entry | Contents                                                                                            | Page no. |
|-------|-----------------------------------------------------------------------------------------------------|----------|
| 1     | Materials and Instruments                                                                           | S2       |
| 2     | <sup>1</sup> H and <sup>13</sup> C NMR of 1,3,5-triformylphloroglucinol                             | S3       |
| 3     | <sup>13</sup> C NMR of 2,4,6-trihydrazinyl-1,3,5-triazine                                           | S4       |
| 4     | Thermogravimetric analysis plot of TP-THzT-CIN                                                      | S5       |
| 5     | Pawley refined PXRD profile                                                                         | S6       |
| 6     | Comparative experimental PXRD pattern of the Tp-THzT-CIN with its simulated AA and AB packing model | S7       |
| 5     | Unit cell parameters and fractional atomistic coordinates of TP-THzT-CIN.                           | S8       |
| 6     | FT-IR spectra of Tp, THzT, rGO, TP-THzT-CIN and CIN-rGO                                             | S9       |
| 7     | The Raman spectra of rGO and Pristine CIN and CIN-rGO composite                                     | S10      |
| 8     | Energy dispersive X-ray spectrum of the Tp-THzT-CIN and CN-rGO composite                            | S11      |
| 9     | Specific capacities of Tp-THzT-CIN (a) and CIN-rGO composite (b) at different current densities.    | S12      |

## Materials and Instruments

Phloroglucinol, mesitylene, benzene-1, 4-dicarboxaldehyde, cyanuric chloride and hydrazine hydrate were purchased from Sigma-aldrich. Dioxane and Acetic acid were obtained from Merck, India. All the chemicals were used without any further purification. Distilled water was used throughout the experiments.

Powder x-ray diffraction patterns were recorded on Bruker AXS D8 Advanced SWAX diffractometer using Ni-filtered Cu K $\alpha$  ( $\lambda= 0.15406$  nm) radiation. Fourier transform infrared spectra (FTIR) were measured with a Perkin-Elmer Spectrum 100 spectrophotometer. Solid state magic angle spinning NMR spectra were recorded in a 500 MHz Bruker Advanced II spectrometer at a sample spinning rate of 8 kHz. Nitrogen adsorption and desorption isotherms were measured at 77 K using a Quantachrome Instruments iSorb HP1, surface area analyser. All the samples were degassed at 150 °C for 10 h before the measurement. Thermogravimetric analysis was performed in TGA instrument thermal analyser TA-SDT Q-600, over the temperature range 30 to 800 °C with heating rate of 10 °C min<sup>-1</sup> under N<sub>2</sub> flow. Scanning electron microscopy (SEM) images were collected in JEOL JEM 6700F with an electron diffraction spectroscopy (EDS) detector. On a JEOL JEM 2010 transmission electron microscope, HRTEM images of the samples were collected. On an Omicron Nanotechnology XPS 0571 spectrometer, X-ray photoelectron spectroscopy (XPS) was performed. Perkin-Elmer 2400 series-II CHN analyser was used for elemental analysis. Trivista 555 spectrograph (Princeton Instruments) was used to record resonance Raman data with 532 nm excitation from a Kr<sup>+</sup> laser (Coherent, Sabre Innova SBRC-DBWK).

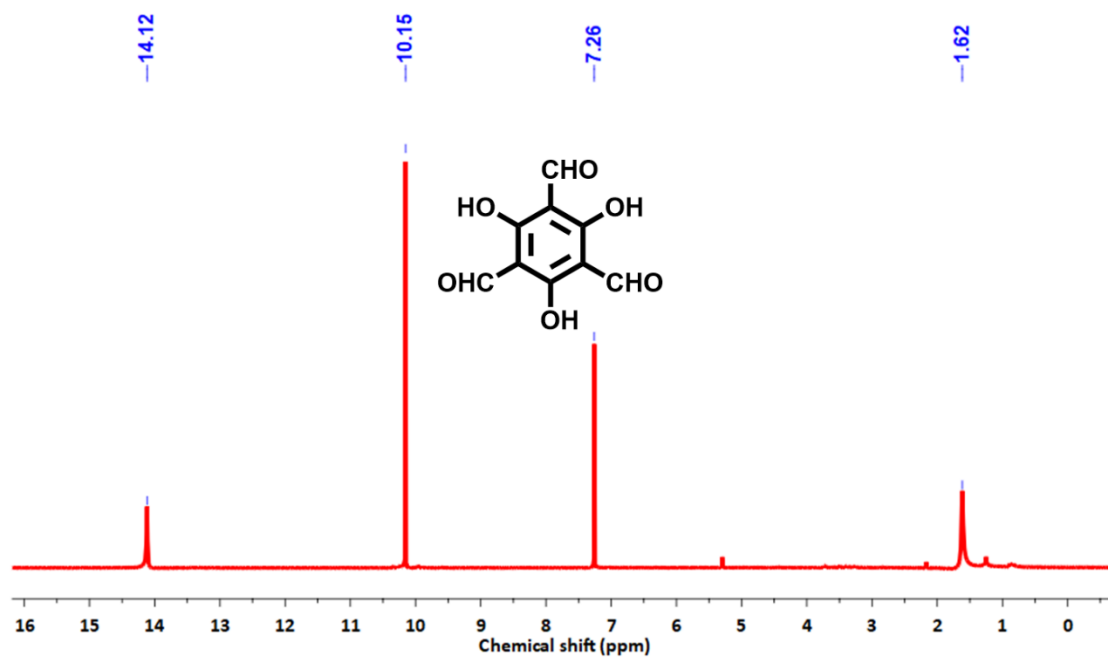

**Figure S1.** <sup>1</sup>H NMR of 1,3,5-triformylphloroglucinol in CDCl<sub>3</sub>.

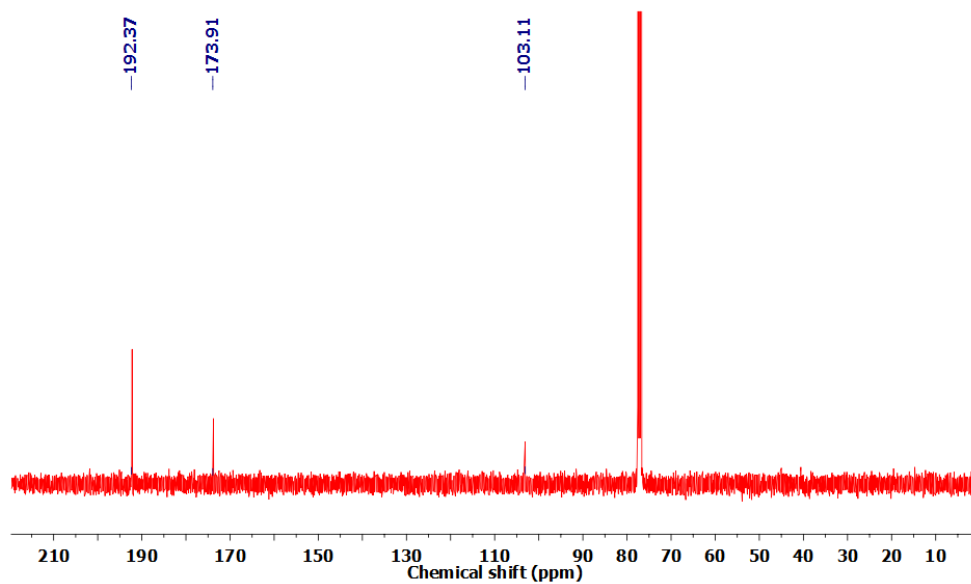

**Figure S2.** <sup>13</sup>C spectra of 1,3,5-triformylphloroglucinol in CDCl<sub>3</sub>.

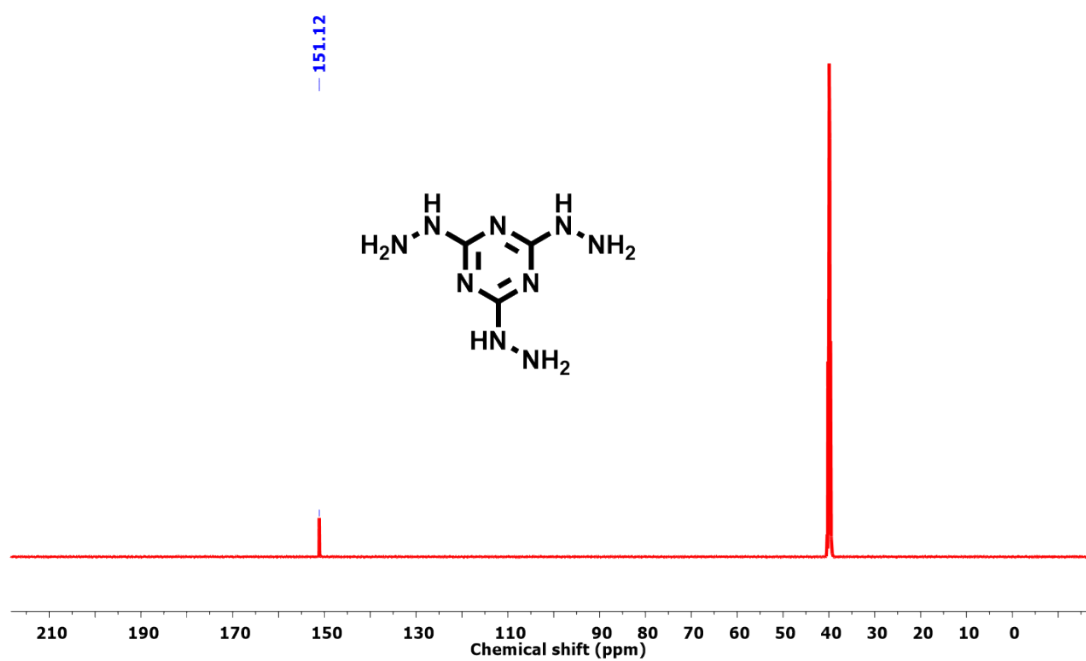

**Figure S3.**  $^{13}\text{C}$  spectra of 2,4,6-trihydrazinyl-1,3,5-triazine in  $\text{DMSO-d}_6$ .

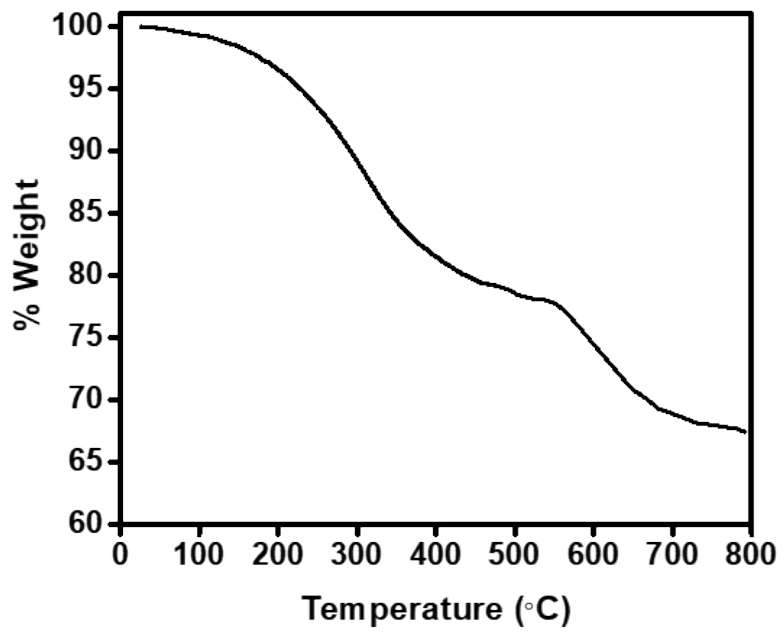

**Figure S4.** Thermogravimetric analysis plot of TP-THzT-CIN.

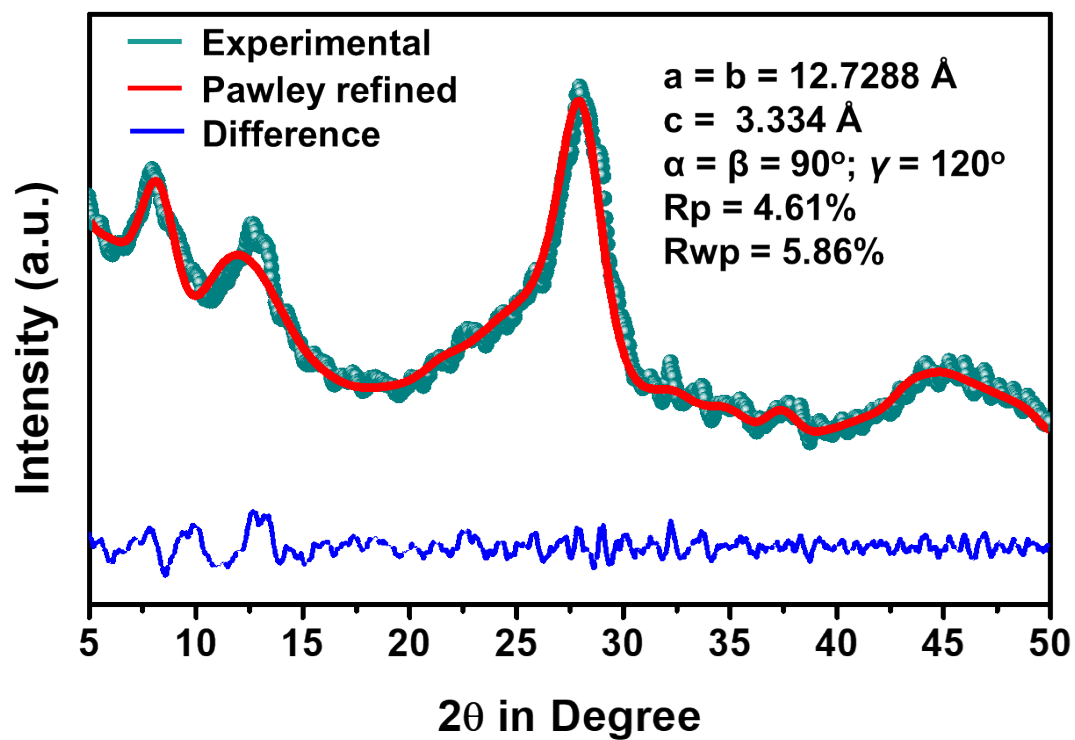

**Figure S5.** Pawley refined (red) powder X-ray profile with experimental (cyan) data of Tp-THzT-CIN.

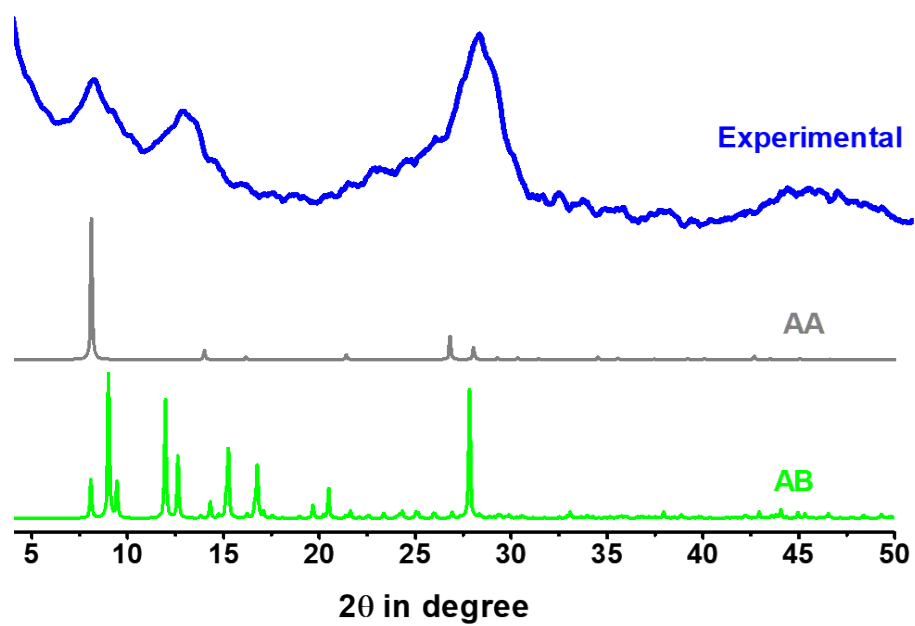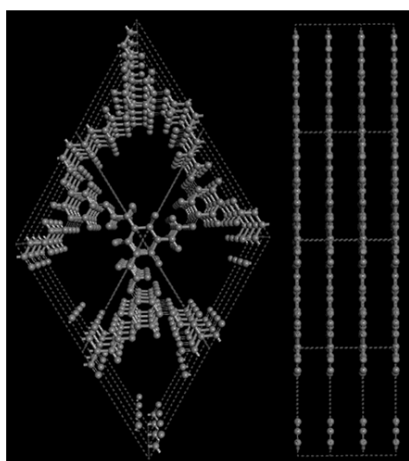

**AA Stacking**

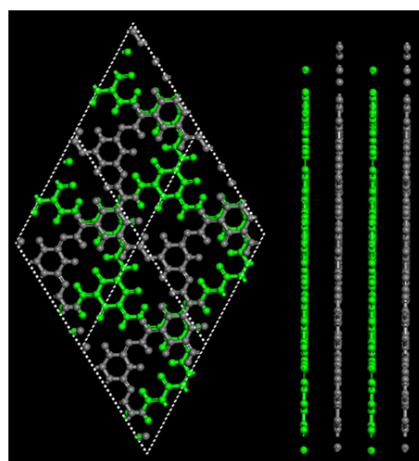

**AB Stacking**

**Figure S6.** Experimental PXRD pattern of the Tp-THzT-CIN with simulated PXRD patterns for AA stacking and AB stacking model.

**Table S1.** Unit cell parameters and fractional atomistic coordinates of TP-THzT-CIN.

| <b>AA Stacking</b>                                                     |                 |                 |          |             |                |                |          |
|------------------------------------------------------------------------|-----------------|-----------------|----------|-------------|----------------|----------------|----------|
| <b>Hexagonal <math>P\bar{6}</math> Space group</b>                     |                 |                 |          |             |                |                |          |
| <b><math>a = b = 12.7288 \text{ \AA}; c = 3.334 \text{ \AA}</math></b> |                 |                 |          |             |                |                |          |
| <b><math>\alpha = \beta = 90^\circ; \gamma = 120^\circ</math></b>      |                 |                 |          |             |                |                |          |
| <b>Atom</b>                                                            | <b>x</b>        | <b>y</b>        | <b>z</b> | <b>Atom</b> | <b>x</b>       | <b>y</b>       | <b>z</b> |
| <b>C23</b>                                                             | <b>-0.11379</b> | <b>0.00555</b>  | <b>0</b> | <b>N29</b>  | <b>0.55920</b> | <b>0.22177</b> | <b>0</b> |
| <b>C24</b>                                                             | <b>-0.12132</b> | <b>-0.11559</b> | <b>0</b> | <b>O30</b>  | <b>0.01248</b> | <b>0.22506</b> | <b>0</b> |
| <b>C25</b>                                                             | <b>0.23137</b>  | <b>0.22525</b>  | <b>0</b> | <b>H31</b>  | <b>1.33340</b> | <b>1.14007</b> | <b>0</b> |
| <b>N</b>                                                               | <b>0.33963</b>  | <b>0.22732</b>  | <b>0</b> | <b>H32</b>  | <b>0.86371</b> | <b>1.34394</b> | <b>0</b> |
| <b>N27</b>                                                             | <b>0.44971</b>  | <b>0.33513</b>  | <b>0</b> | <b>H33</b>  | <b>2.08106</b> | <b>1.76663</b> | <b>0</b> |
| <b>C28</b>                                                             | <b>0.55125</b>  | <b>0.32904</b>  | <b>0</b> |             |                |                |          |



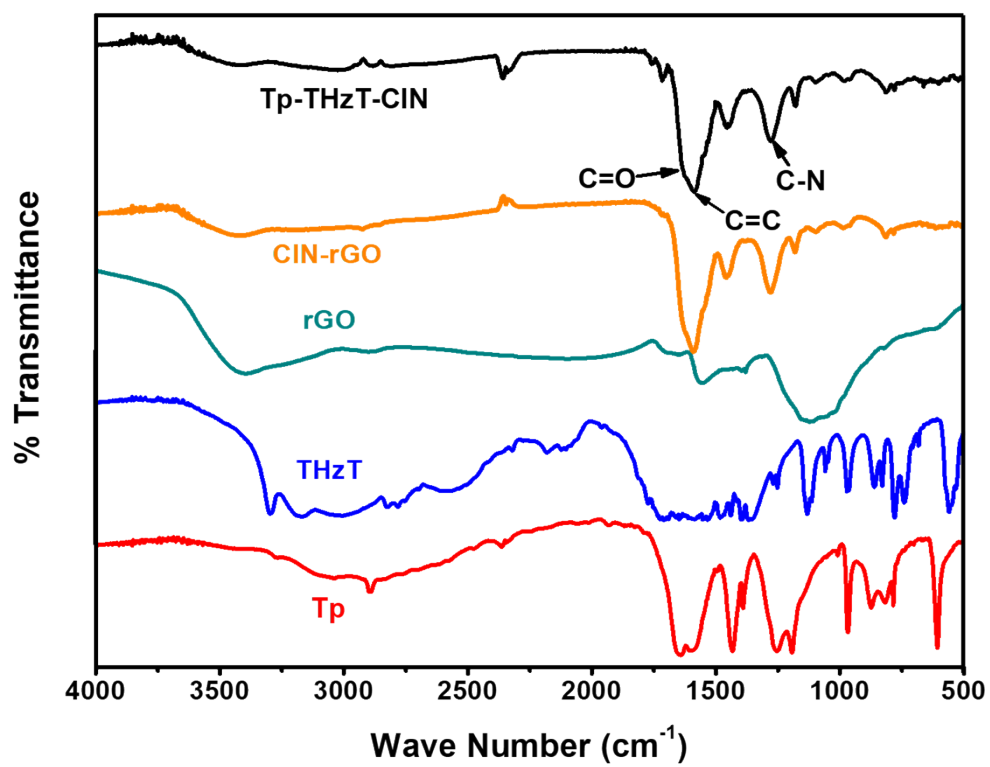

**Figure S7.** FT-IR spectra of Tp, THzT, rGO, TP-THzT-CIN and CIN-rGO.

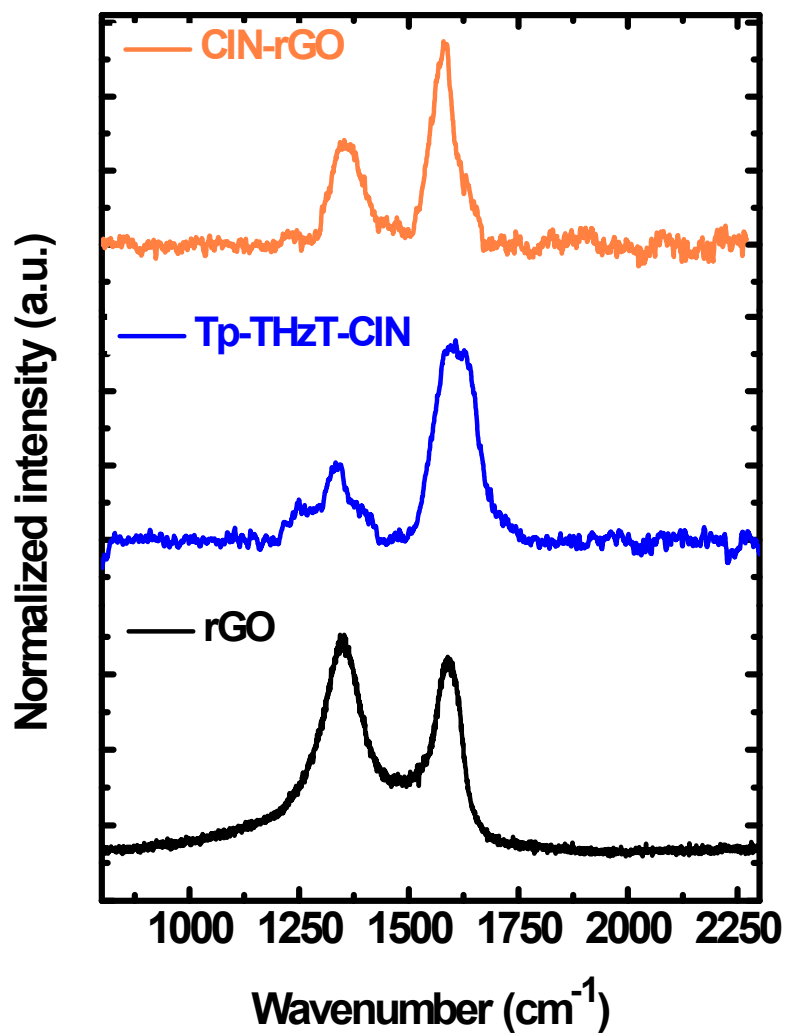

**Figure S8.** The Raman spectra of rGO and Pristine CIN and CIN-rGO composite.

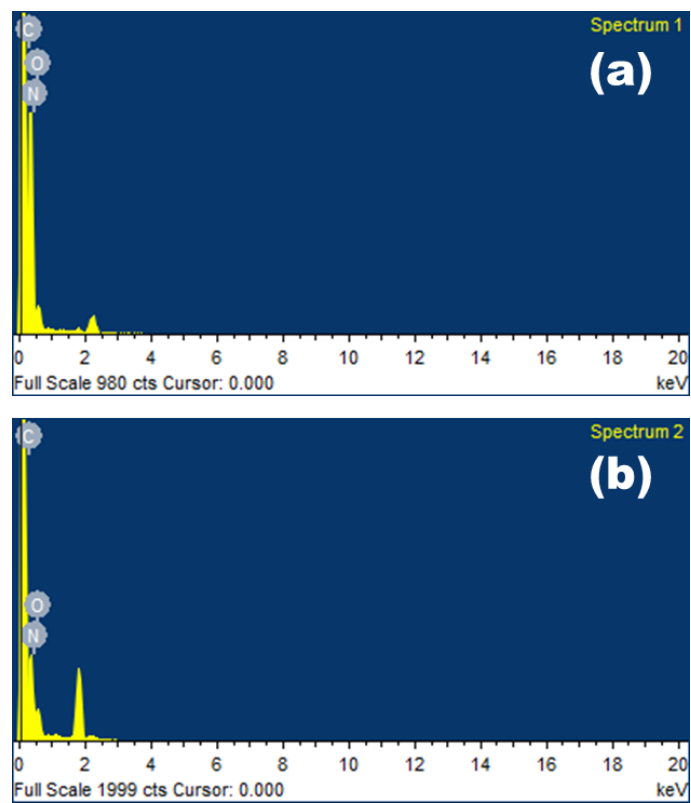

**Figure S9.** Energy dispersive X-ray spectrum of the Tp-THzT-CIN and CN-rGO composite.

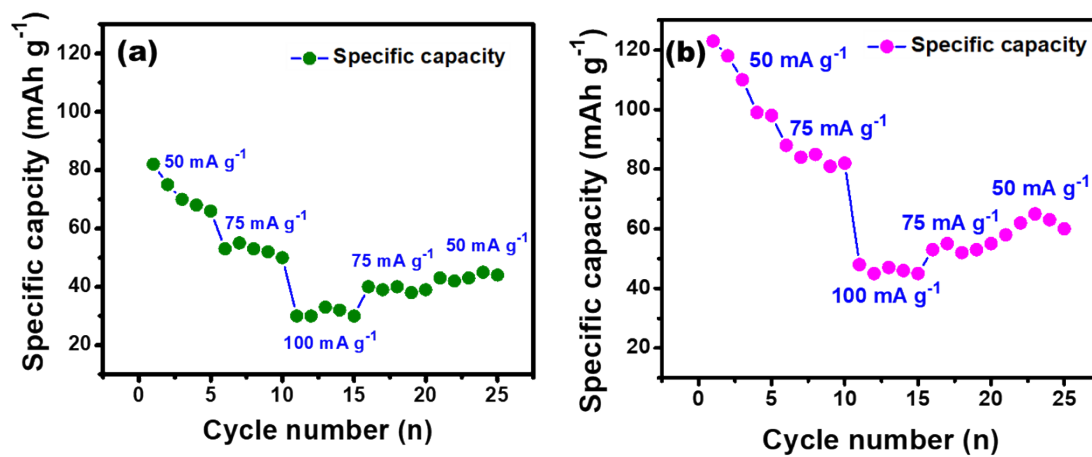

**Figure S10.** Specific capacities of Tp-THzT-CIN (a) and CIN-rGO composite (b) at different current densities.
